# Supplementary material for: ClC-7 requires Ostm1 as a β-subunit to support bone resorption and lysosomal function
Source: Springer Nature journal article supplement (doi:10.1038/nature04535), 2006-03-01
Supplement: 41586_2006_BFnature04535_MOESM2_ESM.pdf [file 41586_2006_BFnature04535_MOESM2_ESM.pdf]

Key genes and/or proteins (Jentsch\_2005-08-09949B):

genes:

*CLCN3*  
*CLCN6*  
*CLCN7*  
*OSTM1*  
*grey-lethal*  
*TCIRG1*  
*ATP6i*

proteins:

CIC-3  
CIC-6  
CIC-7  
Ostm1  
grey-lethal  
ATP6i  
GIPN
